# Supplementary material for: Indole-BODIPY: a “turn-on” chemosensor for Hg2+ with application in live cell imaging
Source: Royal Society of Chemistry journal article supplement (doi:10.1039/c6ra17695j), 2016-01-01
Supplement: c6ra17695j1.pdf [file c6ra17695j1.pdf]

Supporting Information (SI)

**Indole-BODIPY: A “turn-on” chemosensor for Hg<sup>2+</sup> with application in Live Cell imaging**

Navdeep Kaur,<sup>a</sup> Paramjit Kaur,<sup>\*a</sup> Gaurav Bhatia<sup>b</sup>, Kamaljit Singh<sup>\*a</sup> and Jatinder Singh<sup>b</sup>

<sup>a</sup>Department of Chemistry, UGC-Centre of Advanced Studies-II, <sup>b</sup>Department of Molecular Biology and Biochemistry, Guru Nanak Dev University, Amritsar-143 005, Punjab, India.

**E-mail: paramjit19in@yahoo.co.in; kamaljit19in@yahoo.co.in**

|                                                                                                                                                                                                                                                                      |              |
|----------------------------------------------------------------------------------------------------------------------------------------------------------------------------------------------------------------------------------------------------------------------|--------------|
| 1. <sup>1</sup> H NMR spectrum of <b>1</b> in CDCl <sub>3</sub> .                                                                                                                                                                                                    | <b>S1</b>    |
| 2. <sup>13</sup> C NMR spectrum of <b>1</b> in CDCl <sub>3</sub> .                                                                                                                                                                                                   | <b>S2</b>    |
| 3. IR spectrum of <b>1</b> .                                                                                                                                                                                                                                         | <b>S3</b>    |
| 4. Mass spectrum of <b>1</b> .                                                                                                                                                                                                                                       | <b>S3</b>    |
| 5. HSQC spectrum of <b>1</b> in CDCl <sub>3</sub> .                                                                                                                                                                                                                  | <b>S4-S5</b> |
| 6. The emission spectral pattern of <b>1</b> upon pH titrations with HCl and NaOH in CH <sub>3</sub> CN.                                                                                                                                                             | <b>S5</b>    |
| 7. Changes in the emission properties of <b>1</b> at 610 nm upon addition of various metal ions.                                                                                                                                                                     | <b>S6</b>    |
| 8. Responsiveness of <b>1</b> in the presence of 6.6 equiv. of Hg <sup>2+</sup> .                                                                                                                                                                                    | <b>S6</b>    |
| 9. Increase in the emission intensity at 612 nm of <b>1</b> upon addition of increasing amount of Hg <sup>2+</sup> Inset: Graph depicting 3.3 x 10 <sup>-7</sup> M concentration (detection limit) of Hg <sup>2+</sup> to be the lowest to be detected by <b>1</b> . | <b>S7</b>    |
| 10. Representative detection limits for Hg <sup>2+</sup> reported by various research groups.                                                                                                                                                                        | <b>S7</b>    |
| 11. Emission behavior of <b>1</b> in the presence of Hg <sup>2+</sup> and other cations.                                                                                                                                                                             | <b>S8</b>    |
| 12. Optimized structure of the putative Hg <sup>2+</sup> complex of <b>1</b> .                                                                                                                                                                                       | <b>S8</b>    |
| 13. Changes in the emission spectrum of <b>1</b> , upon sequential addition of Hg <sup>2+</sup> and cysteine to the solution of <b>1</b> .                                                                                                                           | <b>S9</b>    |
| 14. Cartesian coordinates of the optimized structure of <b>1</b> .                                                                                                                                                                                                   | <b>S9</b>    |
| 15. Cartesian coordinates of the optimized structure of <b>1</b> +Hg <sup>2+</sup> .                                                                                                                                                                                 | <b>S12</b>   |
| 16. Complete reference 20.                                                                                                                                                                                                                                           | <b>S15</b>   |

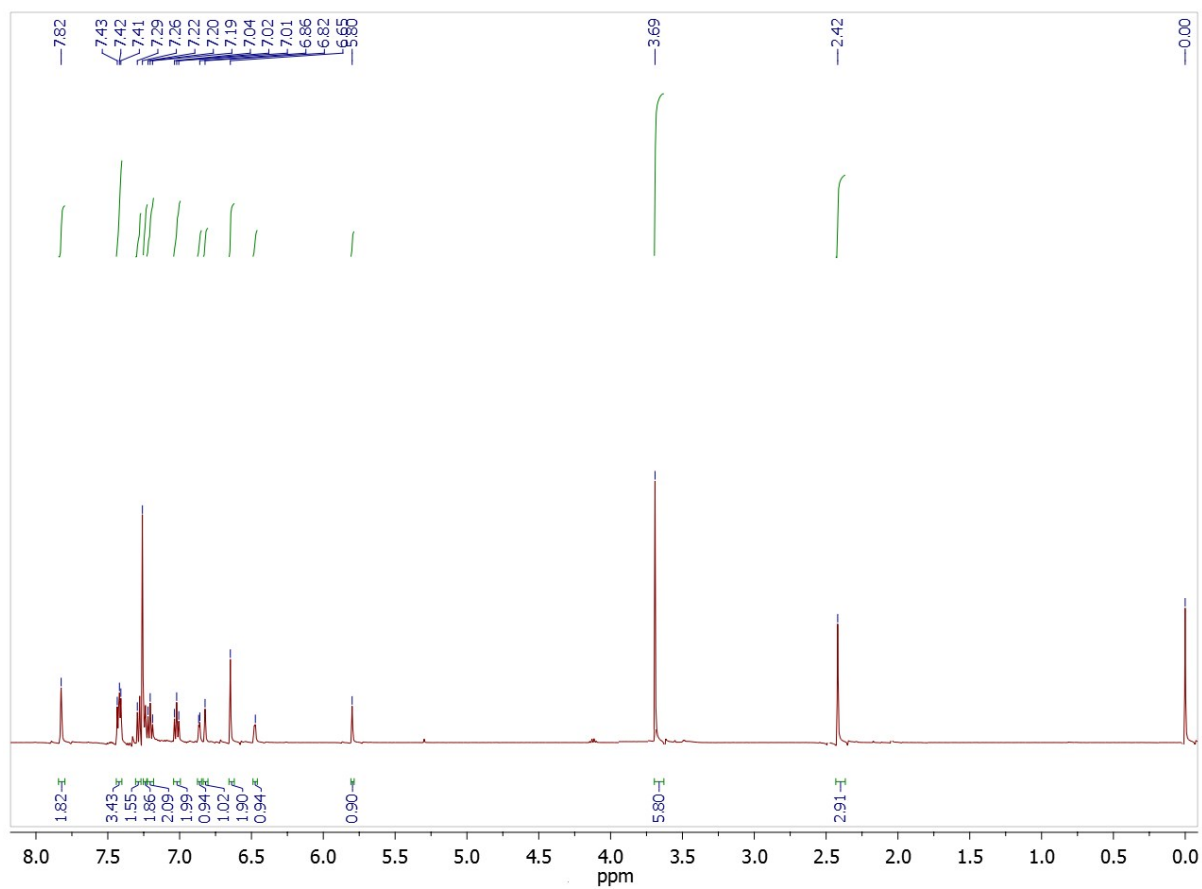

**Fig. S1.**  $^1\text{H}$  NMR spectrum of **1** in  $\text{CDCl}_3$ .

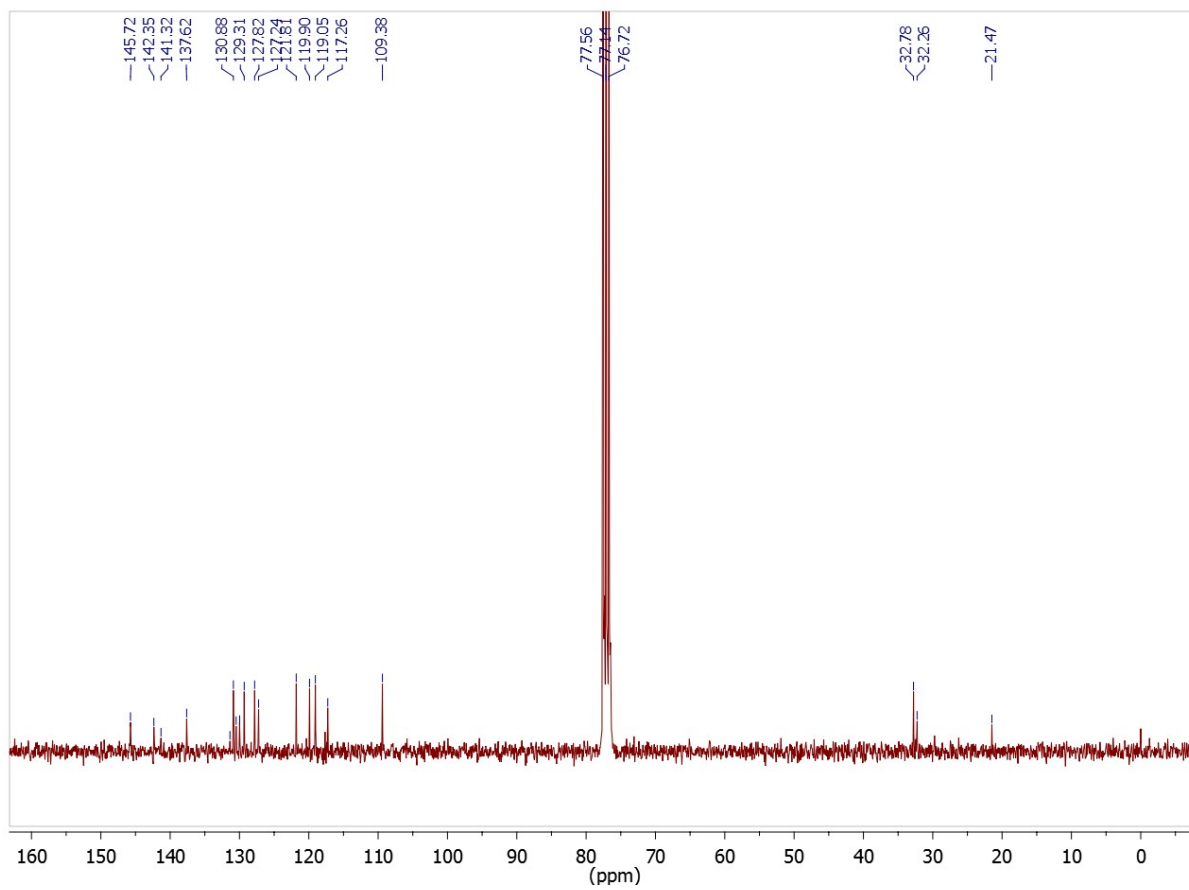

**Fig. S2.**  $^{13}\text{C}$  NMR spectrum of **1** in  $\text{CDCl}_3$ .

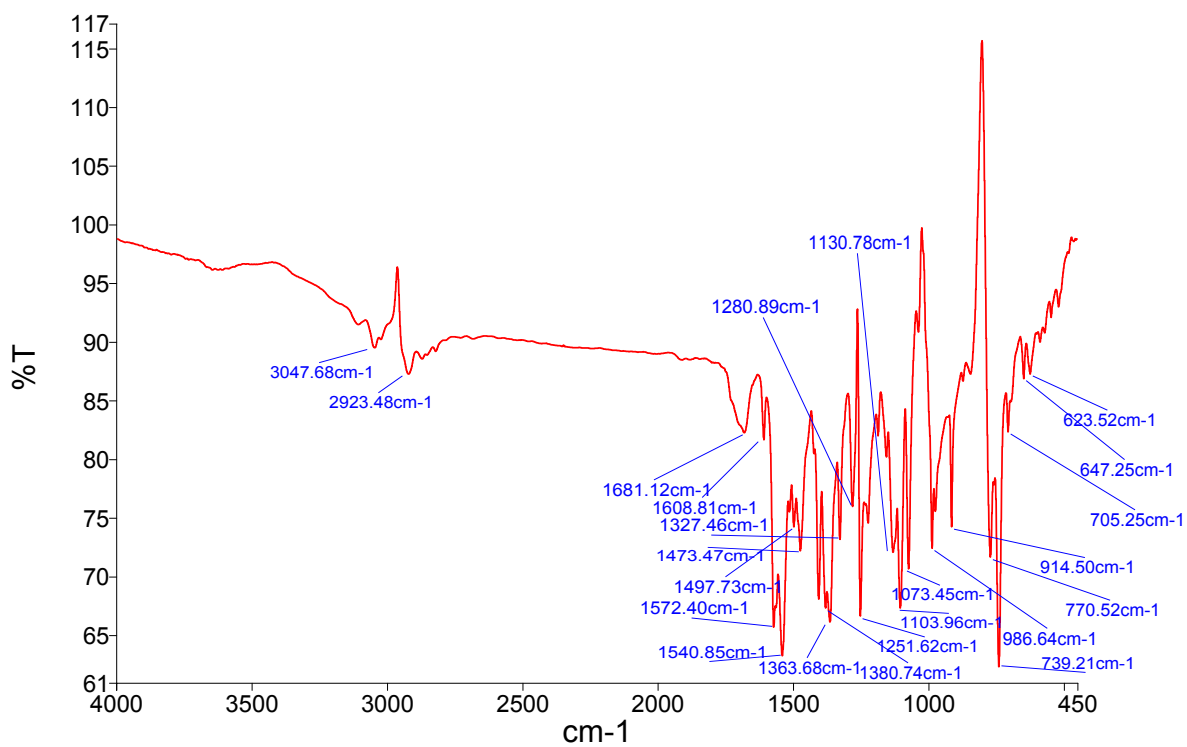

**Fig. S3.** IR spectrum of **1**.

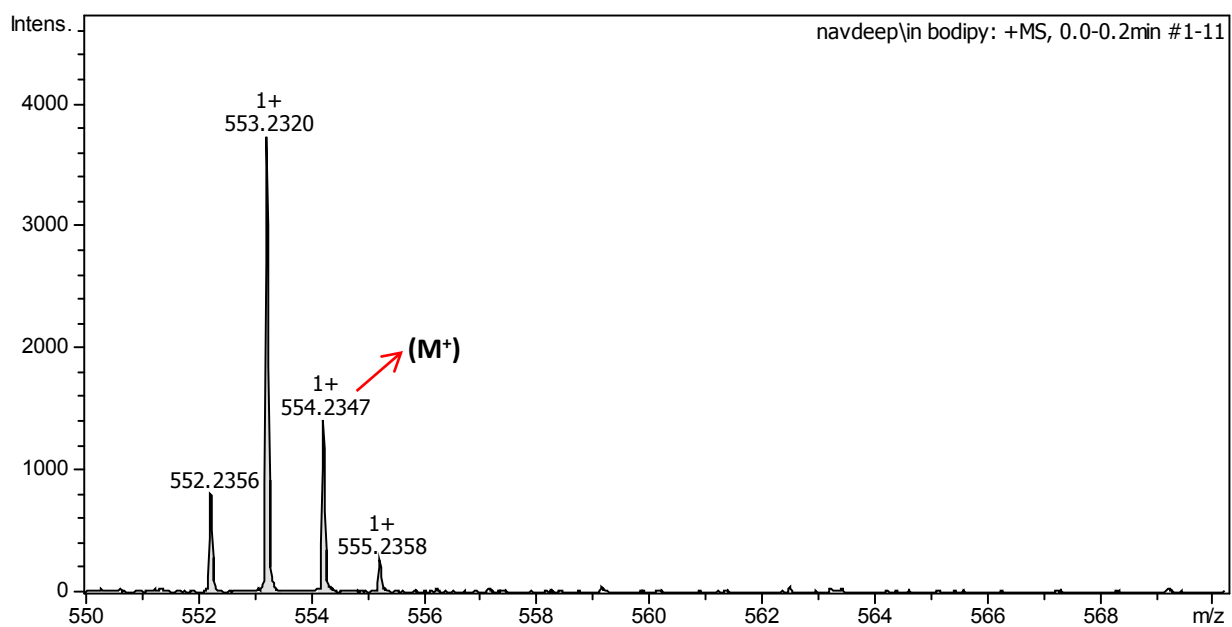

**Fig. S4.** Mass spectrum of **1**.

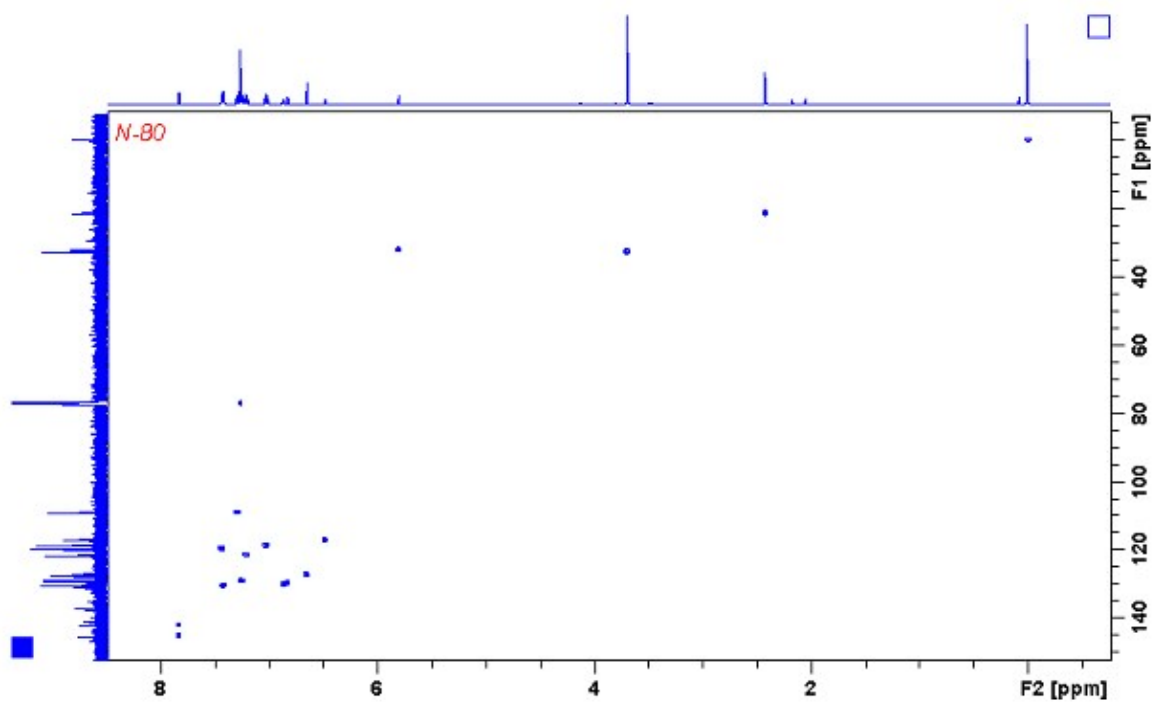

Fig. S5. HSQC spectrum of **1** in  $\text{CDCl}_3$ .

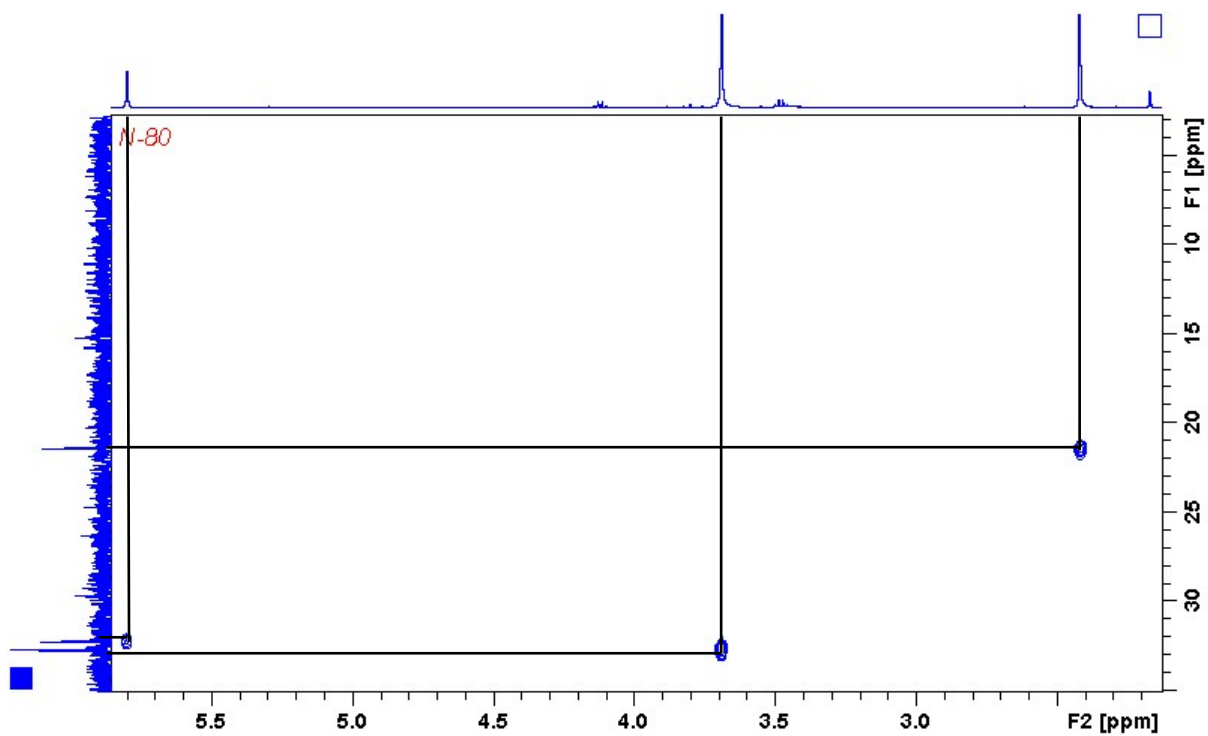

Fig. S5a. Expanded HSQC spectrum of **1**(0-5.8ppm).

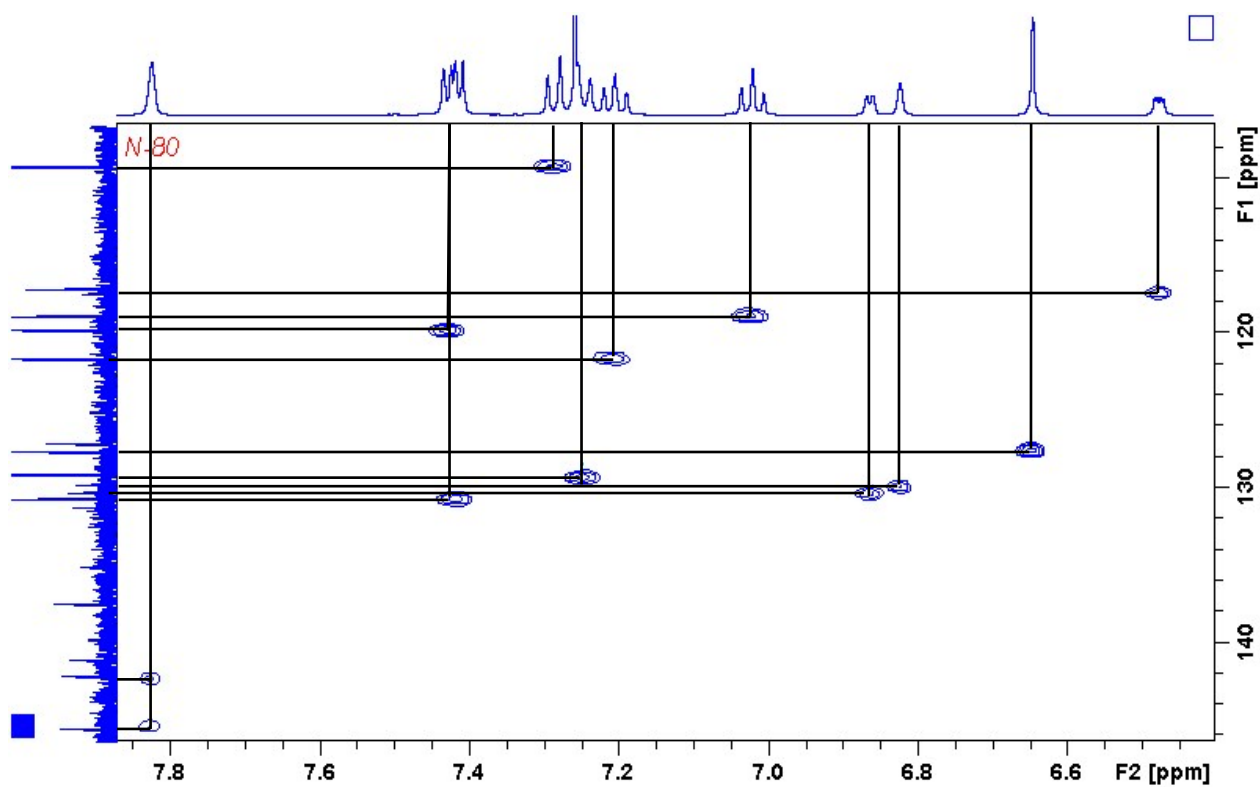

**Fig. S5b.** Expanded HSQC spectrum of **1** (6 -7.8ppm).

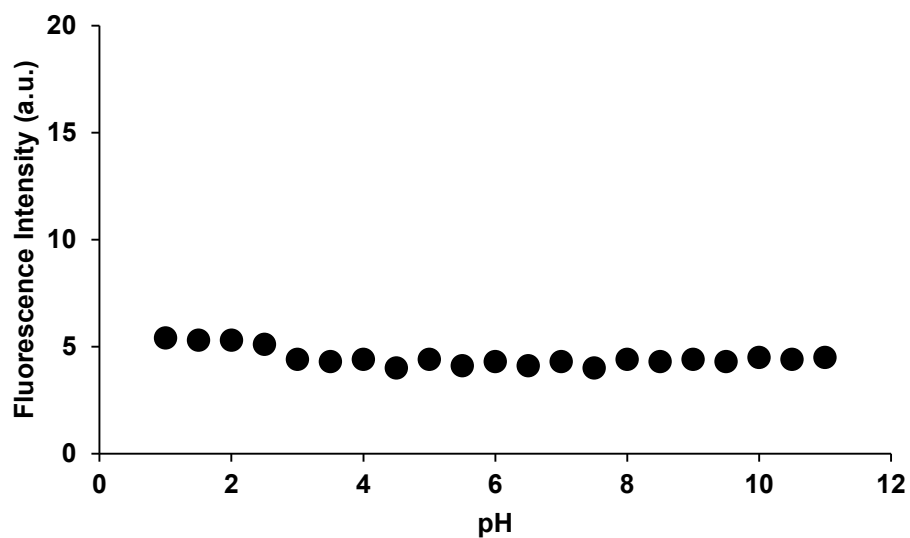

**Fig. S6.** The emission spectral pattern of **1** ( $5 \times 10^{-6}$  M, in  $\text{CH}_3\text{CN}$ ) upon pH titrations with HCl (0.01 M) and NaOH (0.01 M) in  $\text{CH}_3\text{CN}$  at 610 nm.

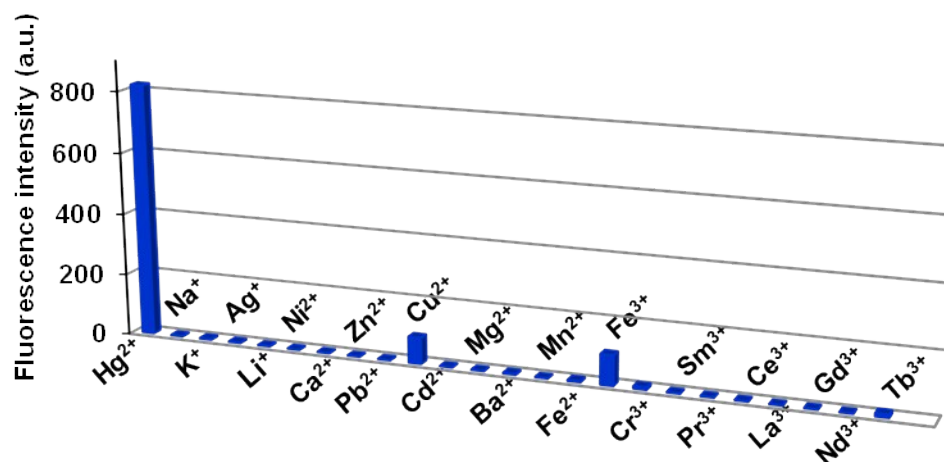

**Fig. S7.** Changes in the emission behavior of **1** ( $5.0 \times 10^{-6}$  M, in CH<sub>3</sub>CN) at 610 nm upon addition of various metal ions ( $3.33 \times 10^{-5}$  M, in water).

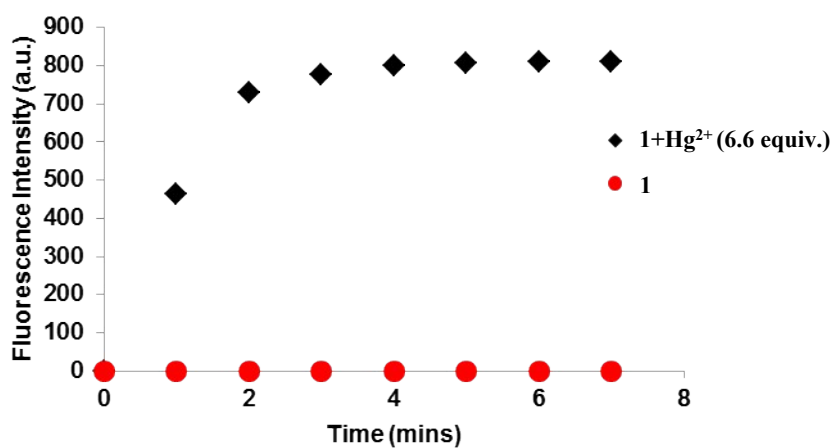

**Fig. S8.** Responsiveness of **1** in the presence of 6.6 equiv. of Hg<sup>2+</sup>.

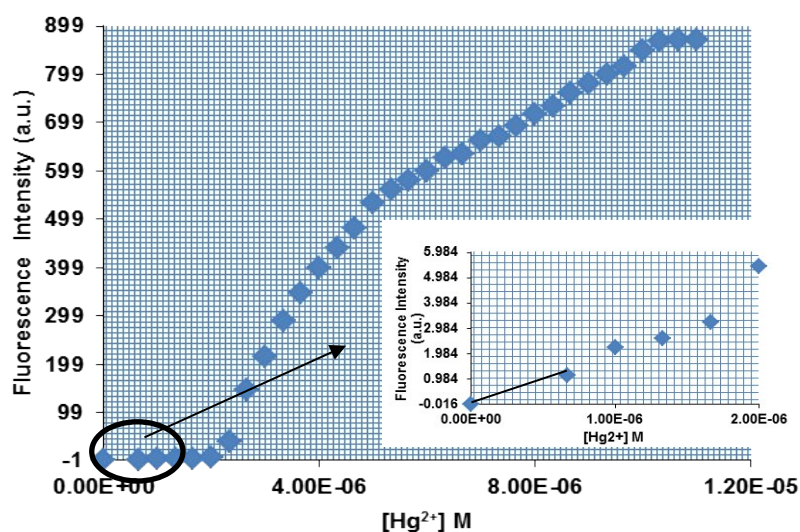

**Fig. S9.** Increase in the emission intensity at 612 nm of **1** ( $5 \times 10^{-6}$  M, in  $\text{CH}_3\text{CN}$ ) upon addition of increasing amount of  $\text{Hg}^{2+}$  ( $1.7 \times 10^{-7}$  M to  $3.3 \times 10^{-5}$  M, in  $\text{H}_2\text{O}$ ) in  $\text{CH}_3\text{CN}$ . Inset: Graph depicting  $3.3 \times 10^{-7}$  M concentration (detection limit) of  $\text{Hg}^{2+}$  to be the lowest to be detected by **1**.

**Table S1.** Representative detection limits for  $\text{Hg}^{2+}$  reported by various research groups.

| References                                 | Detection limit                                          |
|--------------------------------------------|----------------------------------------------------------|
| New J. Chem., <b>2011</b> , 35, 1194–1197  | $0.5 \times 10^{-6}$ M                                   |
| Org. Biomol. Chem., <b>2012</b> , 10, 5410 | $0.226 \times 10^{-6}$ M ,                               |
| J. Mater. Chem., <b>2012</b> , 22, 11475   | $0.015 \times 10^{-6}$ M                                 |
| Inorg. Chem. <b>2013</b> , 52, 11136-11145 | $0.77 \times 10^{-6}$ M                                  |
| Analyst, <b>2013</b> , 138, 3809           | $0.2 \times 10^{-7}$ M                                   |
| New J. Chem., <b>2014</b> , 38, 3770       | $0.168 \times 10^{-6}$ M ,                               |
| Chem. Commun., <b>2014</b> , 50, 1119      | $0.65 \times 10^{-7}$ M,                                 |
| RSC Adv., <b>2015</b> , 5, 30522           | $1.60 \times 10^{-7}$ M.                                 |
| Dalton Trans., <b>2016</b> , 45, 2700      | $0.051 \times 10^{-7}$ M and<br>$0.072 \times 10^{-7}$ M |
| Present work                               | $3.3 \times 10^{-7}$ M                                   |



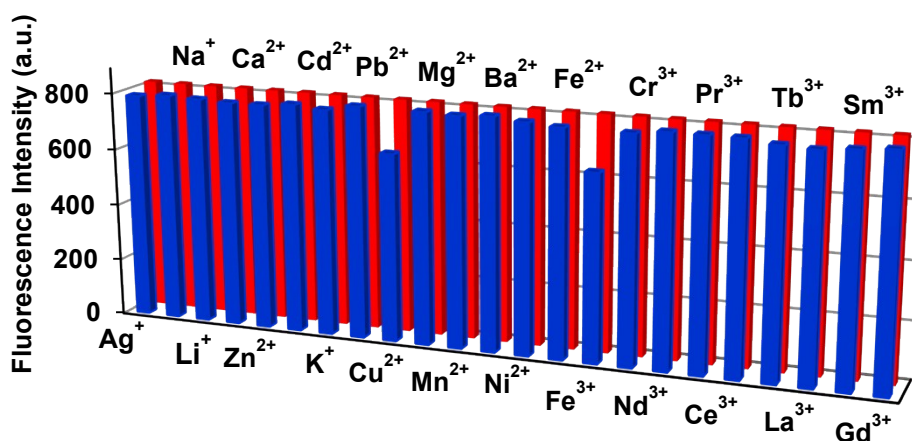

**Fig. S10.** Emission behavior of **1** ( $5.0 \times 10^{-6}$  M, in  $\text{CH}_3\text{CN}$ ) in the presence of  $\text{Hg}^{2+}$  ( $3.33 \times 10^{-5}$  M, in water) (red), and  $\text{Hg}^{2+}$  ( $3.33 \times 10^{-5}$  M, in water) in the presence of other cations ( $3.33 \times 10^{-5}$  M, in water).

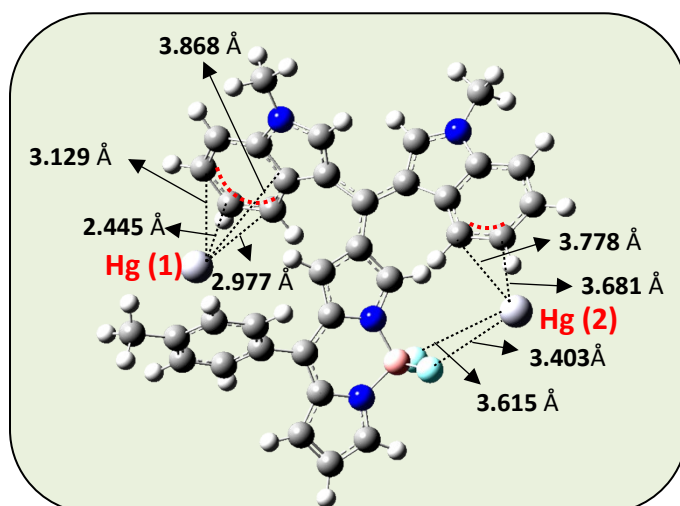

**Fig. S11.** Optimized structure of the putative  $\text{Hg}^{2+}$  complex of **1**.

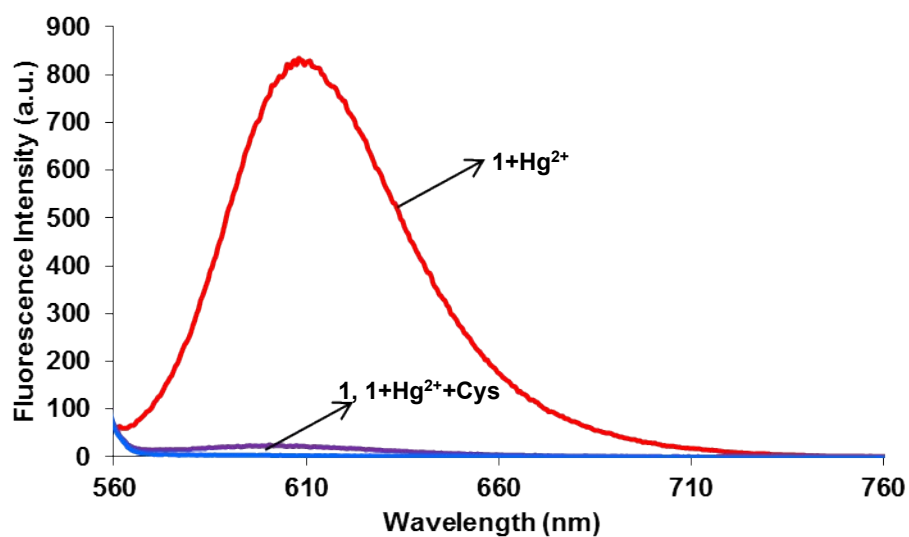

**Fig. S12.** Changes in the emission spectrum of **1**, upon sequential addition of  $\text{Hg}^{2+}$  ( $3.33 \times 10^{-5}$  M, in water) and cysteine ( $8.33 \times 10^{-5}$  M, in water) into solution of **1** ( $5 \times 10^{-6}$  M, in  $\text{CH}_3\text{CN}$ ).

**Table S2.** Cartesian coordinates of the optimized structure of **1**.

SCF Done: E(UB3LYP) = -1793.87490205 a.u.

| Center Number | Atomic Number | Coordinates (Angstroms) |          |           |
|---------------|---------------|-------------------------|----------|-----------|
|               |               | X                       | Y        | Z         |
| 1             | 6             | -5.293001               | 2.389865 | 1.524048  |
| 2             | 6             | -5.668732               | 1.689710 | 0.365056  |
| 3             | 6             | -4.134244               | 1.969311 | 2.199235  |
| 4             | 6             | -4.915421               | 0.613396 | -0.106543 |
| 5             | 1             | -6.559936               | 1.994670 | -0.176528 |
| 6             | 6             | -3.371760               | 0.898492 | 1.730253  |
| 7             | 1             | -3.830838               | 2.481904 | 3.108010  |

|    |   |           |           |           |
|----|---|-----------|-----------|-----------|
| 8  | 6 | -3.747772 | 0.197480  | 0.565981  |
| 9  | 1 | -5.217484 | 0.098043  | -1.011654 |
| 10 | 1 | -2.494940 | 0.579156  | 2.282859  |
| 11 | 6 | -2.950746 | -0.945411 | 0.063082  |
| 12 | 6 | -4.931345 | -2.602425 | -0.064150 |
| 13 | 6 | -5.009833 | -3.939946 | -0.486110 |
| 14 | 1 | -5.726672 | -2.007664 | 0.356064  |
| 15 | 6 | -3.728865 | -4.315672 | -0.915659 |
| 16 | 1 | -5.883600 | -4.573094 | -0.472125 |
| 17 | 1 | -3.376836 | -5.260201 | -1.298565 |
| 18 | 6 | -3.592427 | -2.171849 | -0.252913 |
| 19 | 7 | -2.875000 | -3.259565 | -0.776049 |
| 20 | 6 | -0.644011 | 0.226442  | 0.151921  |
| 21 | 6 | 0.494570  | -1.589911 | -0.611786 |
| 22 | 6 | 0.667103  | -0.239031 | -0.159925 |
| 23 | 1 | -0.898329 | 1.205377  | 0.520375  |
| 24 | 1 | 1.240034  | -2.276043 | -0.980981 |
| 25 | 6 | -1.553551 | -0.825954 | -0.090630 |
| 26 | 7 | -0.796552 | -1.927186 | -0.581526 |
| 27 | 5 | -1.389731 | -3.252017 | -1.155058 |
| 28 | 9 | -1.210019 | -3.263589 | -2.575282 |
| 29 | 9 | -0.703912 | -4.368254 | -0.588295 |
| 30 | 6 | 1.919128  | 0.446373  | -0.090602 |
| 31 | 6 | 0.091549  | 2.754115  | -1.757016 |
| 32 | 6 | 1.144495  | 2.861066  | -0.829543 |
| 33 | 6 | -0.456695 | 3.916491  | -2.298780 |
| 34 | 6 | 1.633638  | 4.160211  | -0.506006 |

|    |   |           |           |           |
|----|---|-----------|-----------|-----------|
| 35 | 6 | 1.981082  | 1.897386  | -0.112919 |
| 36 | 6 | 0.029595  | 5.192446  | -1.942462 |
| 37 | 1 | -1.272932 | 3.839020  | -3.009487 |
| 38 | 6 | 1.087064  | 5.331204  | -1.043945 |
| 39 | 6 | 2.918189  | 2.659297  | 0.586410  |
| 40 | 1 | -0.420879 | 6.077931  | -2.379107 |
| 41 | 1 | 1.472665  | 6.310880  | -0.781662 |
| 42 | 1 | 3.692237  | 2.321546  | 1.257127  |
| 43 | 6 | 2.710910  | -2.384773 | 1.583147  |
| 44 | 6 | 3.454298  | -1.535936 | 0.741874  |
| 45 | 6 | 3.334939  | -3.492359 | 2.155103  |
| 46 | 6 | 4.834469  | -1.826005 | 0.535715  |
| 47 | 6 | 3.166280  | -0.292070 | 0.024388  |
| 48 | 6 | 4.697083  | -3.772187 | 1.912838  |
| 49 | 1 | 2.761559  | -4.155282 | 2.794241  |
| 50 | 6 | 5.467384  | -2.938560 | 1.103563  |
| 51 | 6 | 4.373710  | 0.095110  | -0.558366 |
| 52 | 1 | 5.151672  | -4.647367 | 2.365439  |
| 53 | 1 | 6.517398  | -3.146171 | 0.926310  |
| 54 | 1 | 4.571232  | 0.942860  | -1.195135 |
| 55 | 7 | 5.369277  | -0.817444 | -0.268820 |
| 56 | 7 | 2.711689  | 4.007338  | 0.369230  |
| 57 | 6 | 3.476183  | 5.098077  | 0.958809  |
| 58 | 1 | 3.954536  | 5.704544  | 0.181478  |
| 59 | 1 | 2.830147  | 5.746152  | 1.561181  |
| 60 | 1 | 4.252251  | 4.682580  | 1.604172  |
| 61 | 6 | 6.744030  | -0.766428 | -0.748211 |

|    |   |           |           |           |
|----|---|-----------|-----------|-----------|
| 62 | 1 | 7.448301  | -0.747814 | 0.090929  |
| 63 | 1 | 6.971168  | -1.633811 | -1.377900 |
| 64 | 1 | 6.882384  | 0.140051  | -1.340255 |
| 65 | 6 | -6.095849 | 3.572952  | 2.016359  |
| 66 | 1 | -5.709039 | 4.515311  | 1.604218  |
| 67 | 1 | -7.146946 | 3.495496  | 1.718867  |
| 68 | 1 | -6.057915 | 3.656933  | 3.107899  |
| 69 | 1 | -0.293759 | 1.783612  | -2.043391 |
| 70 | 1 | 1.663982  | -2.189415 | 1.781957  |

**Table S3.** Cartesian coordinates of the optimized structure of **1**+Hg<sup>2+</sup>.

SCF Done: E(UB3LYP) = -2100.80572668 a.u.

| Center<br>Number | Atomic<br>Number | Coordinates (Angstroms) |           |           |
|------------------|------------------|-------------------------|-----------|-----------|
|                  |                  | X                       | Y         | Z         |
| 1                | 6                | -5.134416               | -2.111179 | 2.420757  |
| 2                | 6                | -4.961079               | -2.780384 | 1.198033  |
| 3                | 6                | -3.993072               | -1.603444 | 3.060026  |
| 4                | 6                | -3.692866               | -2.951564 | 0.638905  |
| 5                | 1                | -5.827098               | -3.183881 | 0.679926  |
| 6                | 6                | -2.725453               | -1.748771 | 2.501682  |
| 7                | 1                | -4.096833               | -1.089222 | 4.011846  |
| 8                | 6                | -2.553805               | -2.429797 | 1.282616  |
| 9                | 1                | -3.588868               | -3.464577 | -0.311976 |
| 10               | 1                | -1.859507               | -1.359550 | 3.027787  |
| 11               | 6                | -1.210278               | -2.577786 | 0.686406  |
| 12               | 6                | -1.325470               | -5.120217 | 0.338030  |

|    |   |           |           |           |
|----|---|-----------|-----------|-----------|
| 13 | 6 | -0.432360 | -6.010042 | -0.229798 |
| 14 | 1 | -2.292418 | -5.345735 | 0.763471  |
| 15 | 6 | 0.700672  | -5.257804 | -0.618783 |
| 16 | 1 | -0.552216 | -7.076857 | -0.354016 |
| 17 | 1 | 1.617285  | -5.604635 | -1.077606 |
| 18 | 6 | -0.734568 | -3.821577 | 0.271301  |
| 19 | 7 | 0.528590  | -3.962825 | -0.324559 |
| 20 | 6 | -0.678181 | -0.067507 | 0.693771  |
| 21 | 6 | 1.392191  | -0.298180 | -0.189353 |
| 22 | 6 | 0.460118  | 0.666784  | 0.277189  |
| 23 | 1 | -1.588618 | 0.338515  | 1.107221  |
| 24 | 1 | 2.367514  | -0.143784 | -0.629759 |
| 25 | 6 | -0.398155 | -1.421160 | 0.496632  |
| 26 | 7 | 0.884501  | -1.523543 | -0.061073 |
| 27 | 5 | 1.618366  | -2.856322 | -0.417002 |
| 28 | 9 | 2.156406  | -2.785045 | -1.694270 |
| 29 | 9 | 2.624137  | -3.096123 | 0.521313  |
| 30 | 6 | 0.633856  | 2.097322  | 0.286136  |
| 31 | 6 | -2.185464 | 1.869318  | -1.531906 |
| 32 | 6 | -1.767710 | 2.759690  | -0.549990 |
| 33 | 6 | -3.482000 | 2.034096  | -2.107040 |
| 34 | 6 | -2.612307 | 3.862224  | -0.220242 |
| 35 | 6 | -0.534395 | 2.942929  | 0.200257  |
| 36 | 6 | -4.314886 | 3.140370  | -1.721220 |
| 37 | 1 | -3.683931 | 1.547789  | -3.061927 |
| 38 | 6 | -3.887283 | 4.055523  | -0.781998 |
| 39 | 6 | -0.707925 | 4.124231  | 0.914661  |

|    |   |           |           |           |
|----|---|-----------|-----------|-----------|
| 40 | 1 | -5.274404 | 3.266999  | -2.210461 |
| 41 | 1 | -4.500338 | 4.907906  | -0.511622 |
| 42 | 1 | -0.043706 | 4.582472  | 1.633513  |
| 43 | 6 | 3.536321  | 1.094389  | 1.741807  |
| 44 | 6 | 3.160290  | 2.214859  | 0.987122  |
| 45 | 6 | 4.844978  | 1.010622  | 2.218608  |
| 46 | 6 | 4.115971  | 3.236174  | 0.776851  |
| 47 | 6 | 1.907991  | 2.696288  | 0.399184  |
| 48 | 6 | 5.784081  | 2.026272  | 1.962989  |
| 49 | 1 | 5.139786  | 0.147639  | 2.807817  |
| 50 | 6 | 5.428789  | 3.164317  | 1.240732  |
| 51 | 6 | 2.207681  | 3.981216  | -0.122080 |
| 52 | 1 | 6.794936  | 1.932009  | 2.347169  |
| 53 | 1 | 6.140755  | 3.963286  | 1.063497  |
| 54 | 1 | 1.566189  | 4.639290  | -0.690165 |
| 55 | 7 | 3.492730  | 4.284112  | 0.078626  |
| 56 | 7 | -1.940923 | 4.658564  | 0.678021  |
| 57 | 6 | -2.467051 | 5.882146  | 1.284238  |
| 58 | 1 | -2.655005 | 6.630005  | 0.509784  |
| 59 | 1 | -3.394306 | 5.663542  | 1.818901  |
| 60 | 1 | -1.728368 | 6.268333  | 1.985709  |
| 61 | 6 | 4.172086  | 5.493220  | -0.379967 |
| 62 | 1 | 4.595956  | 6.022997  | 0.476751  |
| 63 | 1 | 4.971855  | 5.226340  | -1.075463 |
| 64 | 1 | 3.449662  | 6.135835  | -0.882616 |
| 65 | 6 | -6.500880 | -1.973993 | 3.045879  |
| 66 | 1 | -7.290663 | -1.981409 | 2.288358  |

|    |    |           |           |           |
|----|----|-----------|-----------|-----------|
| 67 | 1  | -6.697628 | -2.808160 | 3.732214  |
| 68 | 1  | -6.584060 | -1.049727 | 3.626291  |
| 69 | 1  | -1.540790 | 1.075339  | -1.891749 |
| 70 | 1  | 2.828165  | 0.305142  | 1.966787  |
| 71 | 80 | 5.268909  | -1.286727 | -0.626377 |
| 72 | 80 | -4.524120 | 0.091734  | -1.047795 |

---

### Complete reference 20

Gaussian 09, Revision B.01, Frisch, M. J.; Trucks, G. W.; Schlegel, H. B.; Scuseria, G. E.; Robb, M. A.; Cheeseman, J. R.; Scalmani, G.; Barone, V.; Mennucci, B.; Petersson, G. A.; Nakatsuji, H.; Caricato, M.; Li, X.; Hratchian, H. P.; Izmaylov, A. F.; Bloino, J.; Zheng, G.; Sonnenberg, J. L.; Hada, M.; Ehara, M.; Toyota, K.; Fukuda, R.; Hasegawa, J.; Ishida, M.; Nakajima, T.; Honda, Y.; Kitao, O.; Nakai, H.; Vreven, T.; Montgomery, J. A., Jr.; Peralta, J. E.; Ogliaro, F.; Bearpark, M.; Heyd, J. J.; Brothers, E.; Kudin, K. N.; Staroverov, V. N.; Keith, T.; Kobayashi, R.; Normand, J.; Raghavachari, K.; Rendell, A.; Burant, J. C.; Iyengar, S. S.; Tomasi, J.; Cossi, M.; Rega, N.; Millam, J. M.; Klene, M.; Knox, J. E.; Cross, J. B.; Bakken, V.; Adamo, C.; Jaramillo, J.; Gomperts, R.; Stratmann, R. E.; Yazyev, O.; Austin, A. J.; Cammi, R.; Pomelli, C.; Ochterski, J. W.; Martin, R. L.; Morokuma, K.; Zakrzewski, V. G.; Voth, G. A.; Salvador, P.; Dannenberg, J. J.; Dapprich, S.; Daniels, A. D.; Farkas, O.; Foresman, J. B.; Ortiz, J. V.; Cioslowski, J.; Fox, D. J. Gaussian, Inc., Wallingford CT, 2010.
